# Supplementary material for: Impact of socio‐economic deprivation on endometrial cancer survival in the North West of England: a prospective database analysis
Source: PubMed Central journal article supplement (PMC8248174; doi:10.1111/1471-0528.16618), 2021-01-11
Supplement: BJO-128-1215-s005.pdf [file BJO-128-1215-s005.pdf]

**Table S1.** Baseline characteristics stratified by socioeconomic group

| Variable                                  | Social group I<br>(n=147)  | Social group II<br>(n=186) | Social group III<br>(n=199) | p-value | Total<br>(n=532)                        |
|-------------------------------------------|----------------------------|----------------------------|-----------------------------|---------|-----------------------------------------|
| <b>Age at diagnosis</b>                   | Median 68 years            | Median 66 years            | Median 64 years             | 0.002   | Median 66 years (IQR 56, 73)            |
| <50 years                                 | 11 (7.5%)                  | 18 (9.7%)                  | 31 (15.5%)                  |         | 60 (11.3%)                              |
| 50-70 years                               | 78 (53.0%)                 | 99 (53.2%)                 | 115 (57.8%)                 |         | 292 (54.9%)                             |
| >70 years                                 | 58 (39.5%)                 | 69 (37.1%)                 | 53 (26.7%)                  |         | 180 (33.8%)                             |
| <b>Body Mass Index (kg/m<sup>2</sup>)</b> | Median 29kg/m <sup>2</sup> | Median 32kg/m <sup>2</sup> | Median 34kg/m <sup>2</sup>  | <0.001  | Median 32kg/m <sup>2</sup> (IQR 26, 39) |
| Underweight                               | 1 (0.7%)                   | 0 (0.0%)                   | 5 (2.5%)                    |         | 6 (1.1%)                                |
| Normal weight                             | 31 (21.1%)                 | 29 (15.6%)                 | 23 (11.5%)                  |         | 83 (15.6%)                              |
| Overweight                                | 44 (29.9%)                 | 48 (25.8%)                 | 35 (17.6%)                  |         | 127 (23.9%)                             |
| Obese                                     | 71 (48.3%)                 | 109 (58.6%)                | 136 (68.3%)                 |         | 316 (59.4%)                             |
| <b>Grade of EC</b>                        |                            |                            |                             | 0.350   |                                         |
| 1                                         | 58 (39.5%)                 | 82 (44.1%)                 | 99 (49.8%)                  |         | 239 (44.9%)                             |
| 2                                         | 34 (23.1%)                 | 44 (23.7%)                 | 44 (22.1%)                  |         | 122 (22.9%)                             |
| 3                                         | 55 (37.4%)                 | 60 (32.3%)                 | 56 (28.1%)                  |         | 171 (32.1%)                             |
| <b>Stage of EC</b>                        |                            |                            |                             | 0.410   |                                         |
| I                                         | 108 (73.5%)                | 138 (74.6%)                | 152 (76.4%)                 |         | 398 (75.0%)                             |
| II                                        | 13 (8.8%)                  | 20 (10.8%)                 | 22 (11.1%)                  |         | 55 (10.4%)                              |
| III                                       | 23 (15.7%)                 | 22 (11.9%)                 | 24 (12.0%)                  |         | 69 (13.0%)                              |
| IV                                        | 3 (2.0%)                   | 5 (2.7%)                   | 1 (0.5%)                    |         | 9 (1.6%)                                |
| <b>Histology</b>                          |                            |                            |                             | 0.319   |                                         |
| Endometrioid                              | 105 (71.4%)                | 138 (74.2%)                | 156 (78.4%)                 |         | 399 (75.0%)                             |
| Non-endometrioid                          | 42 (28.6%)                 | 48 (25.8%)                 | 43 (21.6%)                  |         | 133 (25.0%)                             |
| <b>Bohkman's category</b>                 |                            |                            |                             | 0.147   |                                         |
| Type 1                                    | 91 (61.9%)                 | 126 (67.7%)                | 143 (71.9%)                 |         | 360 (67.7%)                             |
| Type 2                                    | 56 (38.1%)                 | 60 (32.3%)                 | 56 (28.1%)                  |         | 172 (32.3%)                             |
| <b>Lymphovascular space invasion</b>      |                            |                            |                             | 0.041   |                                         |
| No                                        | 111 (75.5%)                | 119 (64.7%)                | 148 (74.8%)                 |         | 378 (71.5%)                             |
| Yes                                       | 36 (24.5%)                 | 65 (35.3%)                 | 50 (25.3%)                  |         | 151 (28.5%)                             |

|                                            |             |             |             |       |             |
|--------------------------------------------|-------------|-------------|-------------|-------|-------------|
| <b>Depth of myometrial invasion</b>        |             |             |             |       |             |
| <50%                                       | 85 (57.8%)  | 124 (66.7%) | 133 (66.8%) |       | 342 (64.3%) |
| ≥50%                                       | 62 (42.2%)  | 62 (33.3%)  | 66 (33.2%)  | 0.158 | 190 (35.7%) |
| <b>History of diabetes mellitus</b>        |             |             |             |       |             |
| Yes                                        | 22 (15.0%)  | 35 (18.9%)  | 49 (25.0%)  | 0.064 | 106 (20.1%) |
| No                                         | 125 (85.0%) | 150 (81.1%) | 147 (75.0%) |       | 422 (79.9%) |
| <b>Primary treatment</b>                   |             |             |             |       |             |
| Surgery                                    | 131 (89.1%) | 165 (88.7%) | 171 (85.9%) | 0.756 | 467 (87.8%) |
| Hormonal (Fertility sparing reasons)       | 4 (2.7%)    | 7 (3.8%)    | 11 (5.5%)   |       | 22 (4.1%)   |
| Hormonal (Not fit for surgery)             | 12 (8.2%)   | 12 (6.5%)   | 16 (8.0%)   |       | 40 (7.5%)   |
| Radiotherapy                               | 0 (0.0%)    | 2 (1.1%)    | 1 (0.5%)    |       | 3 (0.6%)    |
| <b>Adjuvant treatment</b>                  |             |             |             |       |             |
| Yes                                        | 73 (49.7%)  | 85 (46.0%)  | 79 (39.7%)  | 0.166 | 237 (44.6%) |
| No                                         | 74 (50.3%)  | 100 (54.1%) | 120 (60.3%) |       | 294 (55.3%) |
| <b>Recurrence</b>                          |             |             |             |       |             |
| Yes                                        | 23 (15.6%)  | 30 (16.2%)  | 24 (12.1%)  | 0.461 | 77 (14.5%)  |
| No                                         | 124 (84.4%) | 155 (83.8%) | 175 (87.9%) |       | 454 (85.5%) |
| <b>Survival status at end of follow up</b> |             |             |             |       |             |
| Alive                                      | 117 (79.6%) | 139 (74.7%) | 168 (84.4%) | 0.073 | 424 (79.7%) |
| Cancer-specific mortality                  | 17 (11.6%)  | 35 (18.8%)  | 22 (11.1%)  |       | 74 (13.9%)  |
| Non-cancer related mortality               | 13 (8.8%)   | 12 (6.5%)   | 9 (4.5%)    |       | 34 (6.4%)   |

---

Footnote: Seven women did not have SES data due to unmatched post-codes and were excluded from the findings presented above.
